# Supplementary material for: Differences in Training Adaptations of Endurance Performance during Combined Strength and Endurance Training in a 6-Month Crisis Management Operation
Source: PubMed Central journal article supplement (PMC7084630; doi:10.3390/ijerph17051688), 2020-03-05
Supplement: ijerph-17-01688-s001.pdf [file ijerph-17-01688-s001.pdf]

Supplemental material

Table S1. Group-wise weekly mean ( $\pm$ SD) and range of the training frequency and load during the operation

|                                                    | SE |              |            | Se |              |            | Es |              |            |
|----------------------------------------------------|----|--------------|------------|----|--------------|------------|----|--------------|------------|
|                                                    | n  | Mean (SD)    | Range      | n  | Mean (SD)    | Range      | n  | Mean (SD)    | Range      |
| Endurance training frequency                       | 14 | 1.7 (0.6)    | 0.6-3.1    | 14 | 0.6 (0.4)    | 0.0-1.3    | 18 | 2.1 (0.8)    | 0.8-3.5    |
| Strength training frequency                        | 14 | 1.6 (0.7)    | 0.7-2.8    | 14 | 1.8 (0.4)    | 1.2-2.7    | 18 | 0.8 (0.4)    | 0.0-1.2    |
| Total training frequency                           | 14 | 3.3 (1.2)    | 1.2-5.0    | 14 | 2.4 (0.8)    | 1.4-4.0    | 18 | 2.8 (1.1)    | 0.8-4.4    |
| Low-intensity endurance training volume (min)      | 14 | 58.4 (30.8)  | 30-151     | 11 | 51.4 (21.8)  | 30-93      | 16 | 72.9 (31.7)  | 36-144     |
| Moderate-intensity endurance training volume (min) | 12 | 51.2 (11.8)  | 36-75      | 6  | 40.2 (16.9)  | 24-72      | 17 | 46.9 (13.6)  | 27-67      |
| High-intensity endurance training volume (min)     | 5  | 43.7 (23.3)  | 16-77      | 3  | 29.0 (8.2)   | 22-38      | 9  | 31.7 (10.8)  | 23-53      |
| Lower body strength training load (kg)             | 14 | 14317 (6992) | 3010-27491 | 13 | 16994 (7746) | 4440-31060 | 16 | 15453 (6290) | 4691-27720 |
| Upper body strength training load (kg)             | 12 | 10798 (4496) | 4240-20786 | 12 | 11305 (3330) | 6197-17632 | 16 | 9968 (4018)  | 1800-17341 |
